# Supplementary material for: FDG PET versus CT radiomics to predict outcome in malignant pleural mesothelioma patients
Source: Springer Nature journal article supplement (doi:10.1186/s13550-020-00669-3), 2020-07-13
Supplement: MOESM1 [file 18178222]

### Stable shape features

| Feature name                 | MPM |
|------------------------------|-----|
| volume                       | ✓   |
| surface                      |     |
| compactness 1                |     |
| compactness 2                |     |
| spherical disproportion      |     |
| sphericity                   |     |
| asphericity                  |     |
| surface to volume ratio      |     |
| median thickness             |     |
| standard deviation thickness |     |
| euclidian distance           |     |
| major axis length            |     |
| minor axis length            |     |
| least axis length            |     |
| elongation                   |     |
| flatness                     |     |
| fractal dimension            |     |
| center of mass shift         |     |

Table 1: Stable shape features, intraclass correlation coefficient  $>0.8$ . MPM – malignant pleural mesothelioma.

### Stable intensity features

| Feature name                  | MPM |
|-------------------------------|-----|
| metabolic tumor volume 20%    | ✓   |
| metabolic tumor volume 30%    | ✓   |
| metabolic tumor volume 40%    | ✓   |
| metabolic tumor volume 50%    | ✓   |
| metabolic tumor volume 60%    | ✓   |
| metabolic tumor volume 70%    | ✓   |
| mean                          | ✓   |
| standard deviation            | ✓   |
| coefficient of variation      | ✓   |
| skewness                      |     |
| kurtosis                      |     |
| variance                      | ✓   |
| median                        | ✓   |
| percentile 10th               |     |
| percentile 90th               | ✓   |
| interquartile range           | ✓   |
| range                         | ✓   |
| mean absolut deviation        | ✓   |
| robust mean absolut deviation | ✓   |
| energy                        | ✓   |
| entropy                       | ✓   |
| root mean square              | ✓   |
| uniformity                    | ✓   |

Table 2: Stable intensity features, intraclass correlation coefficient  $>0.8$ . MPM – malignant pleural mesothelioma.

### Stable texture features

| Feature name                               | MPM |
|--------------------------------------------|-----|
| GLCM energy                                | ✓   |
| GLCM entropy                               | ✓   |
| GLCM contrast                              | ✓   |
| GLCM correlation                           |     |
| GLCM homogeneity                           | ✓   |
| GLCM homogeneity normalized                |     |
| GLCM inverse difference                    | ✓   |
| GLCM inverse difference normalized         |     |
| GLCM variance                              | ✓   |
| GLCM sum of average                        | ✓   |
| GLCM sum of entropy                        | ✓   |
| GLCM sum of variance                       | ✓   |
| GLCM difference entropy                    | ✓   |
| GLCM difference variance                   | ✓   |
| GLCM information measures of correlation 1 |     |
| GLCM information measures of correlation 2 |     |
| GLCM maximal correlation coefficient       |     |
| GLCM joint maximum                         | ✓   |
| GLCM joint average                         | ✓   |
| GLCM difference average                    | ✓   |
| GLCM dissimilarity                         | ✓   |
| GLCM inverse variance                      | ✓   |
| GLCM autocorrelation                       | ✓   |
| GLCM cluster tendency                      | ✓   |
| GLCM cluster shade                         | ✓   |
| GLCM cluster prominence                    | ✓   |
| mGLCM energy                               | ✓   |
| mGLCM entropy                              | ✓   |
| mGLCM contrast                             | ✓   |
| mGLCM correlation                          |     |
| mGLCM homogeneity                          | ✓   |
| mGLCM homogeneity normalized               |     |
| mGLCM inverse difference                   | ✓   |
| mGLCM inverse difference normalized        |     |
| mGLCM variance                             | ✓   |
| mGLCM sum of average                       | ✓   |
| mGLCM sum of entropy                       | ✓   |
| mGLCM sum of variance                      | ✓   |
| mGLCM difference entropy                   | ✓   |

| Feature name                                | MPM |
|---------------------------------------------|-----|
| mGLCM difference variance                   | ✓   |
| mGLCM information measures of correlation 1 |     |
| mGLCM information measures of correlation 2 |     |
| mGLCM maximal correlation coefficient       |     |
| mGLCM joint maximum                         | ✓   |
| mGLCM joint average                         | ✓   |
| mGLCM difference average                    | ✓   |
| mGLCM dissimilarity                         | ✓   |
| mGLCM inverse variance                      | ✓   |
| mGLCM autocorrelation                       | ✓   |
| mGLCM cluster tendency                      | ✓   |
| mGLCM cluster shade                         | ✓   |
| mGLCM cluster prominence                    | ✓   |
| NGTDM coarseness                            |     |
| NGTDM contrast                              | ✓   |
| NGTDM busyness                              |     |
| NGTDM complexity                            | ✓   |
| NGTDM strength                              | ✓   |
| GRLM grey level non-uniformity              |     |
| GRLM grey level non-uniformity normalized   | ✓   |
| GRLM zone size non-uniformity               | ✓   |
| GRLM zone size non-uniformity normalized    | ✓   |
| GRLM short runs emphasis                    | ✓   |
| GRLM long runs emphasis                     |     |
| GRLM low grey level run emphasis            |     |
| GRLM high grey level run emphasis           | ✓   |
| GRLM short run low grey level emphasis      |     |
| GRLM short run high grey level emphasis     | ✓   |
| GRLM long run low grey level emphasis       |     |
| GRLM long run high grey level emphasis      | ✓   |
| GRLM run percentage                         |     |
| GRLM grey level variance                    | ✓   |
| GRLM run length variance                    |     |
| GRLM run entropy                            | ✓   |
| mGRLM grey level non-uniformity             |     |
| mGRLM grey level non-uniformity normalized  | ✓   |
| mGRLM zone size non-uniformity              | ✓   |
| mGRLM zone size non-uniformity normalized   | ✓   |
| mGRLM short runs emphasis                   | ✓   |
| mGRLM long runs emphasis                    |     |
| mGRLM low grey level run emphasis           |     |

| Feature name                                  | MPM |
|-----------------------------------------------|-----|
| mGRLM high grey level run emphasis            | ✓   |
| mGRLM short run low grey level emphasis       |     |
| mGRLM short run high grey level emphasis      | ✓   |
| mGRLM long run low grey level emphasis        |     |
| mGRLM long run high grey level emphasis       | ✓   |
| mGRLM run percentage                          |     |
| mGRLM grey level variance                     | ✓   |
| mGRLM run length variance                     |     |
| mGRLM run entropy                             | ✓   |
| GLSZM grey level non-uniformity               | ✓   |
| GLSZM grey level non-uniformity normalized    |     |
| GLSZM zone size non-uniformity                | ✓   |
| GLSZM zone size non-uniformity normalized     | ✓   |
| GLSZM small zone emphasis                     |     |
| GLSZM large zone emphasis                     |     |
| GLSZM low grey level zone emphasis            |     |
| GLSZM high grey level zone emphasis           | ✓   |
| GLSZM small zone low grey level emphasis      |     |
| GLSZM small zone high grey level emphasis     | ✓   |
| GLSZM large zone low grey level emphasis      |     |
| GLSZM large zone high grey level emphasis     |     |
| GLSZM zone percentage                         | ✓   |
| GLSZM grey level variance                     | ✓   |
| GLSZM zone size variance                      |     |
| GLSZM zone size entropy                       |     |
| GLDZM grey level non-uniformity               | ✓   |
| GLDZM grey level non-uniformity normalized    |     |
| GLDZM zone size non-uniformity                | ✓   |
| GLDZM zone size non-uniformity normalized     |     |
| GLDZM small distance emphasis                 |     |
| GLDZM large distance emphasis                 |     |
| GLDZM low grey level zone emphasis            |     |
| GLDZM high grey level zone emphasis           | ✓   |
| GLDZM small distance low grey level emphasis  |     |
| GLDZM small distance high grey level emphasis | ✓   |
| GLDZM large distance low grey level emphasis  |     |
| GLDZM large distance high grey level emphasis |     |
| GLDZM zone percentage                         | ✓   |
| GLDZM grey level variance                     | ✓   |
| GLDZM zone distance variance                  |     |
| GLDZM zone distance entropy                   | ✓   |
| NGLDM grey level non-uniformity               |     |

| Feature name                                     | MPM |
|--------------------------------------------------|-----|
| NGLDM grey level non-uniformity normalized       | ✓   |
| NGLDM dependence count non-uniformity            | ✓   |
| NGLDM dependence count non-uniformity normalized |     |
| NGLDM low dependence emphasis                    | ✓   |
| NGLDM high dependence emphasis                   |     |
| NGLDM low grey level count emphasis              |     |
| NGLDM high grey level count emphasis             | ✓   |
| NGLDM low dependence low grey level emphasis     |     |
| NGLDM low dependence high grey level emphasis    | ✓   |
| NGLDM high dependence low grey level emphasis    |     |
| NGLDM high dependence high grey level emphasis   |     |
| NGLDM grey level variance                        | ✓   |
| NGLDM dependence count variance                  |     |
| NGLDM dependence count entropy                   | ✓   |
| NGLDM dependence count energy                    |     |

Table 3: Stable texture features, intraclass correlation coefficient  $>0.8$ . MPM – malignant pleural mesothelioma, GLCM – the Gray Level Co-occurrence Matrix, mGLCM – the Gray Level Co-occurrence Matrix, NGTDM – the Neighborhood Gray Tone Difference Matrix, GLRM – the Gray Level Run Length Matrix, mGRLM – the merged Gray Level Run Length Matrix, GLSZM – the Gray Level Size Zone Matrix, GLDZM – the Gray Level Distance Zone Matrix, NGLDM – the Neighboring Gray Level Dependence Matrix.

### Stable wavelet features

| Feature name                                   | MPM |
|------------------------------------------------|-----|
| HHH intensity mean                             |     |
| HHH intensity standard deviation               | ✓   |
| HHH intensity coefficient of variation         |     |
| HHH intensity skewness                         |     |
| HHH intensity kurtosis                         |     |
| HHH intensity variance                         | ✓   |
| HHH intensity median                           |     |
| HHH intensity percentile 10th                  | ✓   |
| HHH intensity percentile 90th                  | ✓   |
| HHH intensity interquartile range              | ✓   |
| HHH intensity range                            | ✓   |
| HHH intensity mean absolut deviation           | ✓   |
| HHH intensity robust mean absolut deviation    | ✓   |
| HHH intensity energy                           | ✓   |
| HHH intensity entropy                          | ✓   |
| HHH intensity root mean square                 | ✓   |
| HHH intensity uniformity                       | ✓   |
| HHH GLCM energy                                | ✓   |
| HHH GLCM entropy                               | ✓   |
| HHH GLCM contrast                              | ✓   |
| HHH GLCM correlation                           | ✓   |
| HHH GLCM homogeneity                           | ✓   |
| HHH GLCM homogeneity normalized                | ✓   |
| HHH GLCM inverse difference                    | ✓   |
| HHH GLCM inverse difference normalized         | ✓   |
| HHH GLCM variance                              | ✓   |
| HHH GLCM sum of average                        | ✓   |
| HHH GLCM sum of entropy                        | ✓   |
| HHH GLCM sum of variance                       | ✓   |
| HHH GLCM difference entropy                    | ✓   |
| HHH GLCM difference variance                   | ✓   |
| HHH GLCM information measures of correlation 1 |     |
| HHH GLCM information measures of correlation 2 | ✓   |
| HHH GLCM maximal correlation coefficient       | ✓   |
| HHH GLCM joint maximum                         | ✓   |
| HHH GLCM joint average                         | ✓   |
| HHH GLCM difference average                    | ✓   |
| HHH GLCM dissimilarity                         | ✓   |

| Feature name                                    | MPM |
|-------------------------------------------------|-----|
| HHH GLCM inverse variance                       | ✓   |
| HHH GLCM autocorrelation                        | ✓   |
| HHH GLCM cluster tendency                       | ✓   |
| HHH GLCM cluster shade                          | ✓   |
| HHH GLCM cluster prominence                     | ✓   |
| HHH mGLCM energy                                | ✓   |
| HHH mGLCM entropy                               | ✓   |
| HHH mGLCM contrast                              | ✓   |
| HHH mGLCM correlation                           | ✓   |
| HHH mGLCM homogeneity                           | ✓   |
| HHH mGLCM homogeneity normalized                | ✓   |
| HHH mGLCM inverse difference                    | ✓   |
| HHH mGLCM inverse difference normalized         | ✓   |
| HHH mGLCM variance                              | ✓   |
| HHH mGLCM sum of average                        | ✓   |
| HHH mGLCM sum of entropy                        | ✓   |
| HHH mGLCM sum of variance                       | ✓   |
| HHH mGLCM difference entropy                    | ✓   |
| HHH mGLCM difference variance                   | ✓   |
| HHH mGLCM information measures of correlation 1 | ✓   |
| HHH mGLCM information measures of correlation 2 | ✓   |
| HHH mGLCM maximal correlation coefficient       | ✓   |
| HHH mGLCM joint maximum                         | ✓   |
| HHH mGLCM joint average                         | ✓   |
| HHH mGLCM difference average                    | ✓   |
| HHH mGLCM dissimilarity                         | ✓   |
| HHH mGLCM inverse variance                      | ✓   |
| HHH mGLCM autocorrelation                       | ✓   |
| HHH mGLCM cluster tendency                      | ✓   |
| HHH mGLCM cluster shade                         | ✓   |
| HHH mGLCM cluster prominence                    | ✓   |
| HHH NGTDM coarseness                            | ✓   |
| HHH NGTDM contrast                              | ✓   |
| HHH NGTDM busyness                              | ✓   |
| HHH NGTDM complexity                            | ✓   |
| HHH NGTDM strength                              | ✓   |
| HHH GRLM grey level non-uniformity              | ✓   |
| HHH GRLM grey level non-uniformity normalized   | ✓   |
| HHH GRLM zone size non-uniformity               | ✓   |
| HHH GRLM zone size non-uniformity normalized    | ✓   |

| Feature name                                   | MPM |
|------------------------------------------------|-----|
| HHH GRLM short runs emphasis                   |     |
| HHH GRLM long runs emphasis                    |     |
| HHH GRLM low grey level run emphasis           | ✓   |
| HHH GRLM high grey level run emphasis          | ✓   |
| HHH GRLM short run low grey level emphasis     |     |
| HHH GRLM short run high grey level emphasis    | ✓   |
| HHH GRLM long run low grey level emphasis      |     |
| HHH GRLM long run high grey level emphasis     |     |
| HHH GRLM run percentage                        |     |
| HHH GRLM grey level variance                   | ✓   |
| HHH GRLM run length variance                   |     |
| HHH GRLM run entropy                           |     |
| HHH mGRLM grey level non-uniformity            |     |
| HHH mGRLM grey level non-uniformity normalized | ✓   |
| HHH mGRLM zone size non-uniformity             | ✓   |
| HHH mGRLM zone size non-uniformity normalized  |     |
| HHH mGRLM short runs emphasis                  |     |
| HHH mGRLM long runs emphasis                   |     |
| HHH mGRLM low grey level run emphasis          | ✓   |
| HHH mGRLM high grey level run emphasis         | ✓   |
| HHH mGRLM short run low grey level emphasis    |     |
| HHH mGRLM short run high grey level emphasis   | ✓   |
| HHH mGRLM long run low grey level emphasis     |     |
| HHH mGRLM long run high grey level emphasis    |     |
| HHH mGRLM run percentage                       |     |
| HHH mGRLM grey level variance                  | ✓   |
| HHH mGRLM run length variance                  |     |
| HHH mGRLM run entropy                          |     |
| HHH GLSZM grey level non-uniformity            | ✓   |
| HHH GLSZM grey level non-uniformity normalized |     |
| HHH GLSZM zone size non-uniformity             | ✓   |
| HHH GLSZM zone size non-uniformity normalized  |     |
| HHH GLSZM small zone emphasis                  |     |
| HHH GLSZM large zone emphasis                  |     |
| HHH GLSZM low grey level zone emphasis         | ✓   |
| HHH GLSZM high grey level zone emphasis        | ✓   |
| HHH GLSZM small zone low grey level emphasis   |     |
| HHH GLSZM small zone high grey level emphasis  |     |
| HHH GLSZM large zone low grey level emphasis   |     |
| HHH GLSZM large zone high grey level emphasis  |     |
| HHH GLSZM zone percentage                      |     |
| HHH GLSZM grey level variance                  | ✓   |
| HHH GLSZM zone size variance                   |     |

| Feature name                                         | MPM |
|------------------------------------------------------|-----|
| HHH GLSZM zone size entropy                          |     |
| HHH GLDZM grey level non-uniformity                  | ✓   |
| HHH GLDZM grey level non-uniformity normalized       |     |
| HHH GLDZM zone size non-uniformity                   | ✓   |
| HHH GLDZM zone size non-uniformity normalized        |     |
| HHH GLDZM small distance emphasis                    |     |
| HHH GLDZM large distance emphasis                    |     |
| HHH GLDZM low grey level zone emphasis               | ✓   |
| HHH GLDZM high grey level zone emphasis              | ✓   |
| HHH GLDZM small distance low grey level emphasis     | ✓   |
| HHH GLDZM small distance high grey level emphasis    | ✓   |
| HHH GLDZM large distance low grey level emphasis     | ✓   |
| HHH GLDZM large distance high grey level emphasis    | ✓   |
| HHH GLDZM zone percentage                            |     |
| HHH GLDZM grey level variance                        | ✓   |
| HHH GLDZM zone distance variance                     |     |
| HHH GLDZM zone distance entropy                      |     |
| HHH NGLDM grey level non-uniformity                  |     |
| HHH NGLDM grey level non-uniformity normalized       | ✓   |
| HHH NGLDM dependence count non-uniformity            |     |
| HHH NGLDM dependence count non-uniformity normalized |     |
| HHH NGLDM low dependence emphasis                    |     |
| HHH NGLDM high dependence emphasis                   |     |
| HHH NGLDM low grey level count emphasis              | ✓   |
| HHH NGLDM high grey level count emphasis             | ✓   |
| HHH NGLDM low dependence low grey level emphasis     |     |
| HHH NGLDM low dependence high grey level emphasis    | ✓   |
| HHH NGLDM high dependence low grey level emphasis    |     |
| HHH NGLDM high dependence high grey level emphasis   | ✓   |
| HHH NGLDM grey level variance                        | ✓   |
| HHH NGLDM dependence count variance                  |     |
| HHH NGLDM dependence count entropy                   |     |
| HHH NGLDM dependence count energy                    |     |
| HHL intensity mean                                   |     |
| HHL intensity standard deviation                     | ✓   |
| HHL intensity coefficient of variation               |     |
| HHL intensity skewness                               |     |
| HHL intensity kurtosis                               | ✓   |
| HHL intensity variance                               | ✓   |
| HHL intensity median                                 |     |
| HHL intensity percentile 10th                        | ✓   |
| HHL intensity percentile 90th                        | ✓   |

| Feature name                                   | MPM |
|------------------------------------------------|-----|
| HHL intensity interquartile range              | ✓   |
| HHL intensity range                            | ✓   |
| HHL intensity mean absolut deviation           | ✓   |
| HHL intensity robust mean absolut deviation    | ✓   |
| HHL intensity energy                           | ✓   |
| HHL intensity entropy                          |     |
| HHL intensity root mean square                 | ✓   |
| HHL intensity uniformity                       |     |
| HHL GLCM energy                                |     |
| HHL GLCM entropy                               |     |
| HHL GLCM contrast                              |     |
| HHL GLCM correlation                           |     |
| HHL GLCM homogeneity                           |     |
| HHL GLCM homogeneity normalized                |     |
| HHL GLCM inverse difference                    |     |
| HHL GLCM inverse difference normalized         |     |
| HHL GLCM variance                              |     |
| HHL GLCM sum of average                        | ✓   |
| HHL GLCM sum of entropy                        |     |
| HHL GLCM sum of variance                       |     |
| HHL GLCM difference entropy                    | ✓   |
| HHL GLCM difference variance                   | ✓   |
| HHL GLCM information measures of correlation 1 | ✓   |
| HHL GLCM information measures of correlation 2 | ✓   |
| HHL GLCM maximal correlation coefficient       | ✓   |
| HHL GLCM joint maximum                         |     |
| HHL GLCM joint average                         | ✓   |
| HHL GLCM difference average                    |     |
| HHL GLCM dissimilarity                         |     |
| HHL GLCM inverse variance                      |     |
| HHL GLCM autocorrelation                       | ✓   |
| HHL GLCM cluster tendency                      |     |
| HHL GLCM cluster shade                         | ✓   |
| HHL GLCM cluster prominence                    | ✓   |
| HHL mGLCM energy                               |     |
| HHL mGLCM entropy                              |     |
| HHL mGLCM contrast                             |     |
| HHL mGLCM correlation                          |     |
| HHL mGLCM homogeneity                          |     |
| HHL mGLCM homogeneity normalized               |     |
| HHL mGLCM inverse difference                   |     |
| HHL mGLCM inverse difference normalized        |     |

| Feature name                                    | MPM |
|-------------------------------------------------|-----|
| HHL mGLCM variance                              |     |
| HHL mGLCM sum of average                        | ✓   |
| HHL mGLCM sum of entropy                        |     |
| HHL mGLCM sum of variance                       |     |
| HHL mGLCM difference entropy                    | ✓   |
| HHL mGLCM difference variance                   | ✓   |
| HHL mGLCM information measures of correlation 1 | ✓   |
| HHL mGLCM information measures of correlation 2 | ✓   |
| HHL mGLCM maximal correlation coefficient       | ✓   |
| HHL mGLCM joint maximum                         |     |
| HHL mGLCM joint average                         | ✓   |
| HHL mGLCM difference average                    |     |
| HHL mGLCM dissimilarity                         |     |
| HHL mGLCM inverse variance                      |     |
| HHL mGLCM autocorrelation                       | ✓   |
| HHL mGLCM cluster tendency                      |     |
| HHL mGLCM cluster shade                         | ✓   |
| HHL mGLCM cluster prominence                    | ✓   |
| HHL NGTDM coarseness                            | ✓   |
| HHL NGTDM contrast                              |     |
| HHL NGTDM busyness                              |     |
| HHL NGTDM complexity                            | ✓   |
| HHL NGTDM strength                              |     |
| HHL GRLM grey level non-uniformity              |     |
| HHL GRLM grey level non-uniformity normalized   | ✓   |
| HHL GRLM zone size non-uniformity               |     |
| HHL GRLM zone size non-uniformity normalized    |     |
| HHL GRLM short runs emphasis                    |     |
| HHL GRLM long runs emphasis                     |     |
| HHL GRLM low grey level run emphasis            | ✓   |
| HHL GRLM high grey level run emphasis           | ✓   |
| HHL GRLM short run low grey level emphasis      | ✓   |
| HHL GRLM short run high grey level emphasis     | ✓   |
| HHL GRLM long run low grey level emphasis       |     |
| HHL GRLM long run high grey level emphasis      |     |
| HHL GRLM run percentage                         |     |
| HHL GRLM grey level variance                    | ✓   |
| HHL GRLM run length variance                    |     |
| HHL GRLM run entropy                            |     |
| HHL mGRLM grey level non-uniformity             |     |
| HHL mGRLM grey level non-uniformity normalized  | ✓   |
| HHL mGRLM zone size non-uniformity              |     |

| Feature name                                      | MPM |
|---------------------------------------------------|-----|
| HHL mGRLM zone size non-uniformity normalized     |     |
| HHL mGRLM short runs emphasis                     |     |
| HHL mGRLM long runs emphasis                      |     |
| HHL mGRLM low grey level run emphasis             | ✓   |
| HHL mGRLM high grey level run emphasis            | ✓   |
| HHL mGRLM short run low grey level emphasis       | ✓   |
| HHL mGRLM short run high grey level emphasis      | ✓   |
| HHL mGRLM long run low grey level emphasis        |     |
| HHL mGRLM long run high grey level emphasis       |     |
| HHL mGRLM run percentage                          |     |
| HHL mGRLM grey level variance                     | ✓   |
| HHL mGRLM run length variance                     |     |
| HHL mGRLM run entropy                             |     |
| HHL GLSZM grey level non-uniformity               |     |
| HHL GLSZM grey level non-uniformity normalized    |     |
| HHL GLSZM zone size non-uniformity                | ✓   |
| HHL GLSZM zone size non-uniformity normalized     |     |
| HHL GLSZM small zone emphasis                     |     |
| HHL GLSZM large zone emphasis                     |     |
| HHL GLSZM low grey level zone emphasis            |     |
| HHL GLSZM high grey level zone emphasis           | ✓   |
| HHL GLSZM small zone low grey level emphasis      |     |
| HHL GLSZM small zone high grey level emphasis     | ✓   |
| HHL GLSZM large zone low grey level emphasis      |     |
| HHL GLSZM large zone high grey level emphasis     |     |
| HHL GLSZM zone percentage                         |     |
| HHL GLSZM grey level variance                     | ✓   |
| HHL GLSZM zone size variance                      |     |
| HHL GLSZM zone size entropy                       | ✓   |
| HHL GLDZM grey level non-uniformity               |     |
| HHL GLDZM grey level non-uniformity normalized    |     |
| HHL GLDZM zone size non-uniformity                |     |
| HHL GLDZM zone size non-uniformity normalized     |     |
| HHL GLDZM small distance emphasis                 |     |
| HHL GLDZM large distance emphasis                 |     |
| HHL GLDZM low grey level zone emphasis            |     |
| HHL GLDZM high grey level zone emphasis           | ✓   |
| HHL GLDZM small distance low grey level emphasis  |     |
| HHL GLDZM small distance high grey level emphasis | ✓   |
| HHL GLDZM large distance low grey level emphasis  |     |
| HHL GLDZM large distance high grey level emphasis |     |
| HHL GLDZM zone percentage                         |     |
| HHL GLDZM grey level variance                     | ✓   |

| Feature name                                         | MPM |
|------------------------------------------------------|-----|
| HHL GLDZM zone distance variance                     |     |
| HHL GLDZM zone distance entropy                      | ✓   |
| HHL NGLDM grey level non-uniformity                  |     |
| HHL NGLDM grey level non-uniformity normalized       |     |
| HHL NGLDM dependence count non-uniformity            |     |
| HHL NGLDM dependence count non-uniformity normalized |     |
| HHL NGLDM low dependence emphasis                    |     |
| HHL NGLDM high dependence emphasis                   |     |
| HHL NGLDM low grey level count emphasis              | ✓   |
| HHL NGLDM high grey level count emphasis             | ✓   |
| HHL NGLDM low dependence low grey level emphasis     |     |
| HHL NGLDM low dependence high grey level emphasis    | ✓   |
| HHL NGLDM high dependence low grey level emphasis    |     |
| HHL NGLDM high dependence high grey level emphasis   | ✓   |
| HHL NGLDM grey level variance                        |     |
| HHL NGLDM dependence count variance                  |     |
| HHL NGLDM dependence count entropy                   |     |
| HHL NGLDM dependence count energy                    |     |
| HLH intensity mean                                   |     |
| HLH intensity standard deviation                     | ✓   |
| HLH intensity coefficient of variation               |     |
| HLH intensity skewness                               |     |
| HLH intensity kurtosis                               |     |
| HLH intensity variance                               | ✓   |
| HLH intensity median                                 |     |
| HLH intensity percentile 10th                        | ✓   |
| HLH intensity percentile 90th                        | ✓   |
| HLH intensity interquartile range                    | ✓   |
| HLH intensity range                                  | ✓   |
| HLH intensity mean absolut deviation                 | ✓   |
| HLH intensity robust mean absolut deviation          | ✓   |
| HLH intensity energy                                 | ✓   |
| HLH intensity entropy                                | ✓   |
| HLH intensity root mean square                       | ✓   |
| HLH intensity uniformity                             | ✓   |
| HLH GLCM energy                                      | ✓   |
| HLH GLCM entropy                                     | ✓   |
| HLH GLCM contrast                                    |     |
| HLH GLCM correlation                                 | ✓   |
| HLH GLCM homogeneity                                 | ✓   |
| HLH GLCM homogeneity normalized                      |     |
| HLH GLCM inverse difference                          | ✓   |

| Feature name                                    | MPM |
|-------------------------------------------------|-----|
| HLH GLCM inverse difference normalized          | ✓   |
| HLH GLCM variance                               |     |
| HLH GLCM sum of average                         | ✓   |
| HLH GLCM sum of entropy                         | ✓   |
| HLH GLCM sum of variance                        | ✓   |
| HLH GLCM difference entropy                     | ✓   |
| HLH GLCM difference variance                    | ✓   |
| HLH GLCM information measures of correlation 1  | ✓   |
| HLH GLCM information measures of correlation 2  | ✓   |
| HLH GLCM maximal correlation coefficient        | ✓   |
| HLH GLCM joint maximum                          | ✓   |
| HLH GLCM joint average                          | ✓   |
| HLH GLCM difference average                     | ✓   |
| HLH GLCM dissimilarity                          | ✓   |
| HLH GLCM inverse variance                       | ✓   |
| HLH GLCM autocorrelation                        | ✓   |
| HLH GLCM cluster tendency                       | ✓   |
| HLH GLCM cluster shade                          |     |
| HLH GLCM cluster prominence                     | ✓   |
| HLH mGLCM energy                                | ✓   |
| HLH mGLCM entropy                               | ✓   |
| HLH mGLCM contrast                              | ✓   |
| HLH mGLCM correlation                           |     |
| HLH mGLCM homogeneity                           | ✓   |
| HLH mGLCM homogeneity normalized                |     |
| HLH mGLCM inverse difference                    | ✓   |
| HLH mGLCM inverse difference normalized         | ✓   |
| HLH mGLCM variance                              | ✓   |
| HLH mGLCM sum of average                        | ✓   |
| HLH mGLCM sum of entropy                        | ✓   |
| HLH mGLCM sum of variance                       | ✓   |
| HLH mGLCM difference entropy                    | ✓   |
| HLH mGLCM difference variance                   | ✓   |
| HLH mGLCM information measures of correlation 1 |     |
| HLH mGLCM information measures of correlation 2 | ✓   |
| HLH mGLCM maximal correlation coefficient       | ✓   |
| HLH mGLCM joint maximum                         | ✓   |
| HLH mGLCM joint average                         | ✓   |
| HLH mGLCM difference average                    | ✓   |
| HLH mGLCM dissimilarity                         | ✓   |

| Feature name                                   | MPM |
|------------------------------------------------|-----|
| HLH mGLCM inverse variance                     | ✓   |
| HLH mGLCM autocorrelation                      | ✓   |
| HLH mGLCM cluster tendency                     | ✓   |
| HLH mGLCM cluster shade                        |     |
| HLH mGLCM cluster prominence                   | ✓   |
| HLH NGTDM coarseness                           |     |
| HLH NGTDM contrast                             |     |
| HLH NGTDM busyness                             |     |
| HLH NGTDM complexity                           | ✓   |
| HLH NGTDM strength                             |     |
| HLH GRLM grey level non-uniformity             |     |
| HLH GRLM grey level non-uniformity normalized  | ✓   |
| HLH GRLM zone size non-uniformity              | ✓   |
| HLH GRLM zone size non-uniformity normalized   |     |
| HLH GRLM short runs emphasis                   |     |
| HLH GRLM long runs emphasis                    |     |
| HLH GRLM low grey level run emphasis           | ✓   |
| HLH GRLM high grey level run emphasis          | ✓   |
| HLH GRLM short run low grey level emphasis     | ✓   |
| HLH GRLM short run high grey level emphasis    | ✓   |
| HLH GRLM long run low grey level emphasis      |     |
| HLH GRLM long run high grey level emphasis     |     |
| HLH GRLM run percentage                        |     |
| HLH GRLM grey level variance                   | ✓   |
| HLH GRLM run length variance                   |     |
| HLH GRLM run entropy                           |     |
| HLH mGRLM grey level non-uniformity            |     |
| HLH mGRLM grey level non-uniformity normalized | ✓   |
| HLH mGRLM zone size non-uniformity             | ✓   |
| HLH mGRLM zone size non-uniformity normalized  |     |
| HLH mGRLM short runs emphasis                  |     |
| HLH mGRLM long runs emphasis                   |     |
| HLH mGRLM low grey level run emphasis          | ✓   |
| HLH mGRLM high grey level run emphasis         | ✓   |
| HLH mGRLM short run low grey level emphasis    | ✓   |
| HLH mGRLM short run high grey level emphasis   | ✓   |
| HLH mGRLM long run low grey level emphasis     |     |
| HLH mGRLM long run high grey level emphasis    |     |
| HLH mGRLM run percentage                       |     |
| HLH mGRLM grey level variance                  | ✓   |
| HLH mGRLM run length variance                  |     |
| HLH mGRLM run entropy                          |     |

| Feature name                                         | MPM |
|------------------------------------------------------|-----|
| HLH GLSZM grey level non-uniformity                  |     |
| HLH GLSZM grey level non-uniformity normalized       |     |
| HLH GLSZM zone size non-uniformity                   | ✓   |
| HLH GLSZM zone size non-uniformity normalized        |     |
| HLH GLSZM small zone emphasis                        |     |
| HLH GLSZM large zone emphasis                        |     |
| HLH GLSZM low grey level zone emphasis               |     |
| HLH GLSZM high grey level zone emphasis              | ✓   |
| HLH GLSZM small zone low grey level emphasis         |     |
| HLH GLSZM small zone high grey level emphasis        | ✓   |
| HLH GLSZM large zone low grey level emphasis         |     |
| HLH GLSZM large zone high grey level emphasis        |     |
| HLH GLSZM zone percentage                            |     |
| HLH GLSZM grey level variance                        | ✓   |
| HLH GLSZM zone size variance                         |     |
| HLH GLSZM zone size entropy                          | ✓   |
| HLH GLDZM grey level non-uniformity                  |     |
| HLH GLDZM grey level non-uniformity normalized       |     |
| HLH GLDZM zone size non-uniformity                   |     |
| HLH GLDZM zone size non-uniformity normalized        |     |
| HLH GLDZM small distance emphasis                    |     |
| HLH GLDZM large distance emphasis                    |     |
| HLH GLDZM low grey level zone emphasis               |     |
| HLH GLDZM high grey level zone emphasis              | ✓   |
| HLH GLDZM small distance low grey level emphasis     |     |
| HLH GLDZM small distance high grey level emphasis    | ✓   |
| HLH GLDZM large distance low grey level emphasis     |     |
| HLH GLDZM large distance high grey level emphasis    |     |
| HLH GLDZM zone percentage                            |     |
| HLH GLDZM grey level variance                        | ✓   |
| HLH GLDZM zone distance variance                     |     |
| HLH GLDZM zone distance entropy                      | ✓   |
| HLH NGLDM grey level non-uniformity                  |     |
| HLH NGLDM grey level non-uniformity normalized       | ✓   |
| HLH NGLDM dependence count non-uniformity            |     |
| HLH NGLDM dependence count non-uniformity normalized |     |
| HLH NGLDM low dependence emphasis                    | ✓   |
| HLH NGLDM high dependence emphasis                   |     |
| HLH NGLDM low grey level count emphasis              | ✓   |
| HLH NGLDM high grey level count emphasis             | ✓   |
| HLH NGLDM low dependence low grey level emphasis     |     |
| HLH NGLDM low dependence high grey level emphasis    | ✓   |
| HLH NGLDM high dependence low grey level emphasis    |     |

| Feature name                                       | MPM |
|----------------------------------------------------|-----|
| HLH NGLDM high dependence high grey level emphasis |     |
| HLH NGLDM grey level variance                      | ✓   |
| HLH NGLDM dependence count variance                |     |
| HLH NGLDM dependence count entropy                 |     |
| HLH NGLDM dependence count energy                  |     |
| HLL intensity mean                                 | ✓   |
| HLL intensity standard deviation                   | ✓   |
| HLL intensity coefficient of variation             |     |
| HLL intensity skewness                             |     |
| HLL intensity kurtosis                             |     |
| HLL intensity variance                             | ✓   |
| HLL intensity median                               |     |
| HLL intensity percentile 10th                      |     |
| HLL intensity percentile 90th                      | ✓   |
| HLL intensity interquartile range                  |     |
| HLL intensity range                                | ✓   |
| HLL intensity mean absolut deviation               | ✓   |
| HLL intensity robust mean absolut deviation        |     |
| HLL intensity energy                               | ✓   |
| HLL intensity entropy                              | ✓   |
| HLL intensity root mean square                     | ✓   |
| HLL intensity uniformity                           | ✓   |
| HLL GLCM energy                                    | ✓   |
| HLL GLCM entropy                                   | ✓   |
| HLL GLCM contrast                                  | ✓   |
| HLL GLCM correlation                               |     |
| HLL GLCM homogeneity                               | ✓   |
| HLL GLCM homogeneity normalized                    |     |
| HLL GLCM inverse difference                        | ✓   |
| HLL GLCM inverse difference normalized             |     |
| HLL GLCM variance                                  | ✓   |
| HLL GLCM sum of average                            | ✓   |
| HLL GLCM sum of entropy                            | ✓   |
| HLL GLCM sum of variance                           | ✓   |
| HLL GLCM difference entropy                        | ✓   |
| HLL GLCM difference variance                       | ✓   |
| HLL GLCM information measures of correlation 1     | ✓   |
| HLL GLCM information measures of correlation 2     | ✓   |
| HLL GLCM maximal correlation coefficient           | ✓   |
| HLL GLCM joint maximum                             |     |
| HLL GLCM joint average                             | ✓   |

| Feature name                                    | MPM |
|-------------------------------------------------|-----|
| HLL GLCM difference average                     | ✓   |
| HLL GLCM dissimilarity                          | ✓   |
| HLL GLCM inverse variance                       |     |
| HLL GLCM autocorrelation                        |     |
| HLL GLCM cluster tendency                       | ✓   |
| HLL GLCM cluster shade                          | ✓   |
| HLL GLCM cluster prominence                     | ✓   |
| HLL mGLCM energy                                | ✓   |
| HLL mGLCM entropy                               | ✓   |
| HLL mGLCM contrast                              | ✓   |
| HLL mGLCM correlation                           |     |
| HLL mGLCM homogeneity                           | ✓   |
| HLL mGLCM homogeneity normalized                |     |
| HLL mGLCM inverse difference                    | ✓   |
| HLL mGLCM inverse difference normalized         |     |
| HLL mGLCM variance                              | ✓   |
| HLL mGLCM sum of average                        | ✓   |
| HLL mGLCM sum of entropy                        | ✓   |
| HLL mGLCM sum of variance                       | ✓   |
| HLL mGLCM difference entropy                    | ✓   |
| HLL mGLCM difference variance                   | ✓   |
| HLL mGLCM information measures of correlation 1 |     |
| HLL mGLCM information measures of correlation 2 | ✓   |
| HLL mGLCM maximal correlation coefficient       |     |
| HLL mGLCM joint maximum                         |     |
| HLL mGLCM joint average                         | ✓   |
| HLL mGLCM difference average                    | ✓   |
| HLL mGLCM dissimilarity                         | ✓   |
| HLL mGLCM inverse variance                      |     |
| HLL mGLCM autocorrelation                       |     |
| HLL mGLCM cluster tendency                      | ✓   |
| HLL mGLCM cluster shade                         | ✓   |
| HLL mGLCM cluster prominence                    | ✓   |
| HLL NGTDM coarseness                            |     |
| HLL NGTDM contrast                              |     |
| HLL NGTDM busyness                              |     |
| HLL NGTDM complexity                            | ✓   |
| HLL NGTDM strength                              | ✓   |
| HLL GRLM grey level non-uniformity              |     |
| HLL GRLM grey level non-uniformity normalized   | ✓   |
| HLL GRLM zone size non-uniformity               | ✓   |

| Feature name                                   | MPM |
|------------------------------------------------|-----|
| HLL GRLM zone size non-uniformity normalized   |     |
| HLL GRLM short runs emphasis                   |     |
| HLL GRLM long runs emphasis                    |     |
| HLL GRLM low grey level run emphasis           | ✓   |
| HLL GRLM high grey level run emphasis          |     |
| HLL GRLM short run low grey level emphasis     |     |
| HLL GRLM short run high grey level emphasis    | ✓   |
| HLL GRLM long run low grey level emphasis      |     |
| HLL GRLM long run high grey level emphasis     |     |
| HLL GRLM run percentage                        |     |
| HLL GRLM grey level variance                   | ✓   |
| HLL GRLM run length variance                   |     |
| HLL GRLM run entropy                           | ✓   |
| HLL mGRLM grey level non-uniformity            |     |
| HLL mGRLM grey level non-uniformity normalized | ✓   |
| HLL mGRLM zone size non-uniformity             | ✓   |
| HLL mGRLM zone size non-uniformity normalized  |     |
| HLL mGRLM short runs emphasis                  |     |
| HLL mGRLM long runs emphasis                   |     |
| HLL mGRLM low grey level run emphasis          | ✓   |
| HLL mGRLM high grey level run emphasis         |     |
| HLL mGRLM short run low grey level emphasis    |     |
| HLL mGRLM short run high grey level emphasis   | ✓   |
| HLL mGRLM long run low grey level emphasis     |     |
| HLL mGRLM long run high grey level emphasis    |     |
| HLL mGRLM run percentage                       |     |
| HLL mGRLM grey level variance                  | ✓   |
| HLL mGRLM run length variance                  |     |
| HLL mGRLM run entropy                          | ✓   |
| HLL GLSZM grey level non-uniformity            |     |
| HLL GLSZM grey level non-uniformity normalized |     |
| HLL GLSZM zone size non-uniformity             | ✓   |
| HLL GLSZM zone size non-uniformity normalized  |     |
| HLL GLSZM small zone emphasis                  |     |
| HLL GLSZM large zone emphasis                  |     |
| HLL GLSZM low grey level zone emphasis         |     |
| HLL GLSZM high grey level zone emphasis        |     |
| HLL GLSZM small zone low grey level emphasis   |     |
| HLL GLSZM small zone high grey level emphasis  |     |
| HLL GLSZM large zone low grey level emphasis   |     |
| HLL GLSZM large zone high grey level emphasis  |     |
| HLL GLSZM zone percentage                      |     |
| HLL GLSZM grey level variance                  | ✓   |

| Feature name                                         | MPM |
|------------------------------------------------------|-----|
| HLL GLSZM zone size variance                         |     |
| HLL GLSZM zone size entropy                          | ✓   |
| HLL GLDZM grey level non-uniformity                  |     |
| HLL GLDZM grey level non-uniformity normalized       |     |
| HLL GLDZM zone size non-uniformity                   | ✓   |
| HLL GLDZM zone size non-uniformity normalized        |     |
| HLL GLDZM small distance emphasis                    |     |
| HLL GLDZM large distance emphasis                    |     |
| HLL GLDZM low grey level zone emphasis               |     |
| HLL GLDZM high grey level zone emphasis              |     |
| HLL GLDZM small distance low grey level emphasis     |     |
| HLL GLDZM small distance high grey level emphasis    |     |
| HLL GLDZM large distance low grey level emphasis     |     |
| HLL GLDZM large distance high grey level emphasis    |     |
| HLL GLDZM zone percentage                            |     |
| HLL GLDZM grey level variance                        | ✓   |
| HLL GLDZM zone distance variance                     |     |
| HLL GLDZM zone distance entropy                      | ✓   |
| HLL NGLDM grey level non-uniformity                  |     |
| HLL NGLDM grey level non-uniformity normalized       | ✓   |
| HLL NGLDM dependence count non-uniformity            | ✓   |
| HLL NGLDM dependence count non-uniformity normalized |     |
| HLL NGLDM low dependence emphasis                    | ✓   |
| HLL NGLDM high dependence emphasis                   |     |
| HLL NGLDM low grey level count emphasis              | ✓   |
| HLL NGLDM high grey level count emphasis             |     |
| HLL NGLDM low dependence low grey level emphasis     |     |
| HLL NGLDM low dependence high grey level emphasis    |     |
| HLL NGLDM high dependence low grey level emphasis    |     |
| HLL NGLDM high dependence high grey level emphasis   |     |
| HLL NGLDM grey level variance                        | ✓   |
| HLL NGLDM dependence count variance                  |     |
| HLL NGLDM dependence count entropy                   | ✓   |
| HLL NGLDM dependence count energy                    |     |
| LHH intensity mean                                   |     |
| LHH intensity standard deviation                     | ✓   |
| LHH intensity coefficient of variation               |     |
| LHH intensity skewness                               |     |
| LHH intensity kurtosis                               |     |
| LHH intensity variance                               | ✓   |
| LHH intensity median                                 |     |
| LHH intensity percentile 10th                        | ✓   |
| LHH intensity percentile 90th                        | ✓   |

| Feature name                                   | MPM |
|------------------------------------------------|-----|
| LHH intensity interquartile range              | ✓   |
| LHH intensity range                            | ✓   |
| LHH intensity mean absolut deviation           | ✓   |
| LHH intensity robust mean absolut deviation    | ✓   |
| LHH intensity energy                           | ✓   |
| LHH intensity entropy                          | ✓   |
| LHH intensity root mean square                 | ✓   |
| LHH intensity uniformity                       | ✓   |
| LHH GLCM energy                                | ✓   |
| LHH GLCM entropy                               | ✓   |
| LHH GLCM contrast                              | ✓   |
| LHH GLCM correlation                           |     |
| LHH GLCM homogeneity                           | ✓   |
| LHH GLCM homogeneity normalized                |     |
| LHH GLCM inverse difference                    | ✓   |
| LHH GLCM inverse difference normalized         | ✓   |
| LHH GLCM variance                              | ✓   |
| LHH GLCM sum of average                        | ✓   |
| LHH GLCM sum of entropy                        | ✓   |
| LHH GLCM sum of variance                       | ✓   |
| LHH GLCM difference entropy                    | ✓   |
| LHH GLCM difference variance                   | ✓   |
| LHH GLCM information measures of correlation 1 | ✓   |
| LHH GLCM information measures of correlation 2 | ✓   |
| LHH GLCM maximal correlation coefficient       | ✓   |
| LHH GLCM joint maximum                         | ✓   |
| LHH GLCM joint average                         | ✓   |
| LHH GLCM difference average                    | ✓   |
| LHH GLCM dissimilarity                         | ✓   |
| LHH GLCM inverse variance                      | ✓   |
| LHH GLCM autocorrelation                       | ✓   |
| LHH GLCM cluster tendency                      | ✓   |
| LHH GLCM cluster shade                         | ✓   |
| LHH GLCM cluster prominence                    | ✓   |
| LHH mGLCM energy                               | ✓   |
| LHH mGLCM entropy                              | ✓   |
| LHH mGLCM contrast                             | ✓   |
| LHH mGLCM correlation                          |     |
| LHH mGLCM homogeneity                          | ✓   |
| LHH mGLCM homogeneity normalized               |     |

| Feature name                                    | MPM |
|-------------------------------------------------|-----|
| LHH mGLCM inverse difference                    | ✓   |
| LHH mGLCM inverse difference normalized         | ✓   |
| LHH mGLCM variance                              | ✓   |
| LHH mGLCM sum of average                        | ✓   |
| LHH mGLCM sum of entropy                        | ✓   |
| LHH mGLCM sum of variance                       | ✓   |
| LHH mGLCM difference entropy                    | ✓   |
| LHH mGLCM difference variance                   | ✓   |
| LHH mGLCM information measures of correlation 1 |     |
| LHH mGLCM information measures of correlation 2 | ✓   |
| LHH mGLCM maximal correlation coefficient       | ✓   |
| LHH mGLCM joint maximum                         | ✓   |
| LHH mGLCM joint average                         | ✓   |
| LHH mGLCM difference average                    | ✓   |
| LHH mGLCM dissimilarity                         | ✓   |
| LHH mGLCM inverse variance                      | ✓   |
| LHH mGLCM autocorrelation                       | ✓   |
| LHH mGLCM cluster tendency                      | ✓   |
| LHH mGLCM cluster shade                         | ✓   |
| LHH mGLCM cluster prominence                    | ✓   |
| LHH NGTDM coarseness                            | ✓   |
| LHH NGTDM contrast                              |     |
| LHH NGTDM busyness                              |     |
| LHH NGTDM complexity                            | ✓   |
| LHH NGTDM strength                              |     |
| LHH GRLM grey level non-uniformity              |     |
| LHH GRLM grey level non-uniformity normalized   | ✓   |
| LHH GRLM zone size non-uniformity               |     |
| LHH GRLM zone size non-uniformity normalized    |     |
| LHH GRLM short runs emphasis                    |     |
| LHH GRLM long runs emphasis                     |     |
| LHH GRLM low grey level run emphasis            | ✓   |
| LHH GRLM high grey level run emphasis           | ✓   |
| LHH GRLM short run low grey level emphasis      |     |
| LHH GRLM short run high grey level emphasis     | ✓   |
| LHH GRLM long run low grey level emphasis       |     |
| LHH GRLM long run high grey level emphasis      |     |
| LHH GRLM run percentage                         |     |
| LHH GRLM grey level variance                    | ✓   |
| LHH GRLM run length variance                    |     |
| LHH GRLM run entropy                            |     |

| Feature name                                      | MPM |
|---------------------------------------------------|-----|
| LHH mGRLM grey level non-uniformity               |     |
| LHH mGRLM grey level non-uniformity normalized    | ✓   |
| LHH mGRLM zone size non-uniformity                |     |
| LHH mGRLM zone size non-uniformity normalized     |     |
| LHH mGRLM short runs emphasis                     |     |
| LHH mGRLM long runs emphasis                      |     |
| LHH mGRLM low grey level run emphasis             | ✓   |
| LHH mGRLM high grey level run emphasis            | ✓   |
| LHH mGRLM short run low grey level emphasis       | ✓   |
| LHH mGRLM short run high grey level emphasis      | ✓   |
| LHH mGRLM long run low grey level emphasis        |     |
| LHH mGRLM long run high grey level emphasis       |     |
| LHH mGRLM run percentage                          |     |
| LHH mGRLM grey level variance                     | ✓   |
| LHH mGRLM run length variance                     |     |
| LHH mGRLM run entropy                             |     |
| LHH GLSZM grey level non-uniformity               |     |
| LHH GLSZM grey level non-uniformity normalized    | ✓   |
| LHH GLSZM zone size non-uniformity                | ✓   |
| LHH GLSZM zone size non-uniformity normalized     |     |
| LHH GLSZM small zone emphasis                     |     |
| LHH GLSZM large zone emphasis                     |     |
| LHH GLSZM low grey level zone emphasis            | ✓   |
| LHH GLSZM high grey level zone emphasis           | ✓   |
| LHH GLSZM small zone low grey level emphasis      |     |
| LHH GLSZM small zone high grey level emphasis     | ✓   |
| LHH GLSZM large zone low grey level emphasis      |     |
| LHH GLSZM large zone high grey level emphasis     |     |
| LHH GLSZM zone percentage                         |     |
| LHH GLSZM grey level variance                     | ✓   |
| LHH GLSZM zone size variance                      |     |
| LHH GLSZM zone size entropy                       | ✓   |
| LHH GLDZM grey level non-uniformity               |     |
| LHH GLDZM grey level non-uniformity normalized    | ✓   |
| LHH GLDZM zone size non-uniformity                |     |
| LHH GLDZM zone size non-uniformity normalized     |     |
| LHH GLDZM small distance emphasis                 |     |
| LHH GLDZM large distance emphasis                 |     |
| LHH GLDZM low grey level zone emphasis            | ✓   |
| LHH GLDZM high grey level zone emphasis           | ✓   |
| LHH GLDZM small distance low grey level emphasis  | ✓   |
| LHH GLDZM small distance high grey level emphasis | ✓   |

| Feature name                                         | MPM |
|------------------------------------------------------|-----|
| LHH GLDZM large distance low grey level emphasis     |     |
| LHH GLDZM large distance high grey level emphasis    |     |
| LHH GLDZM zone percentage                            |     |
| LHH GLDZM grey level variance                        | ✓   |
| LHH GLDZM zone distance variance                     |     |
| LHH GLDZM zone distance entropy                      | ✓   |
| LHH NGLDM grey level non-uniformity                  |     |
| LHH NGLDM grey level non-uniformity normalized       | ✓   |
| LHH NGLDM dependence count non-uniformity            |     |
| LHH NGLDM dependence count non-uniformity normalized |     |
| LHH NGLDM low dependence emphasis                    |     |
| LHH NGLDM high dependence emphasis                   |     |
| LHH NGLDM low grey level count emphasis              | ✓   |
| LHH NGLDM high grey level count emphasis             | ✓   |
| LHH NGLDM low dependence low grey level emphasis     |     |
| LHH NGLDM low dependence high grey level emphasis    | ✓   |
| LHH NGLDM high dependence low grey level emphasis    |     |
| LHH NGLDM high dependence high grey level emphasis   | ✓   |
| LHH NGLDM grey level variance                        | ✓   |
| LHH NGLDM dependence count variance                  |     |
| LHH NGLDM dependence count entropy                   |     |
| LHH NGLDM dependence count energy                    |     |
| LHL intensity mean                                   |     |
| LHL intensity standard deviation                     | ✓   |
| LHL intensity coefficient of variation               |     |
| LHL intensity skewness                               |     |
| LHL intensity kurtosis                               | ✓   |
| LHL intensity variance                               | ✓   |
| LHL intensity median                                 |     |
| LHL intensity percentile 10th                        | ✓   |
| LHL intensity percentile 90th                        | ✓   |
| LHL intensity interquartile range                    | ✓   |
| LHL intensity range                                  | ✓   |
| LHL intensity mean absolut deviation                 | ✓   |
| LHL intensity robust mean absolut deviation          | ✓   |
| LHL intensity energy                                 | ✓   |
| LHL intensity entropy                                | ✓   |
| LHL intensity root mean square                       | ✓   |
| LHL intensity uniformity                             | ✓   |
| LHL GLCM energy                                      |     |
| LHL GLCM entropy                                     | ✓   |

| Feature name                                    | MPM |
|-------------------------------------------------|-----|
| LHL GLCM contrast                               | ✓   |
| LHL GLCM correlation                            |     |
| LHL GLCM homogeneity                            | ✓   |
| LHL GLCM homogeneity normalized                 |     |
| LHL GLCM inverse difference                     | ✓   |
| LHL GLCM inverse difference normalized          |     |
| LHL GLCM variance                               | ✓   |
| LHL GLCM sum of average                         | ✓   |
| LHL GLCM sum of entropy                         | ✓   |
| LHL GLCM sum of variance                        | ✓   |
| LHL GLCM difference entropy                     | ✓   |
| LHL GLCM difference variance                    | ✓   |
| LHL GLCM information measures of correlation 1  |     |
| LHL GLCM information measures of correlation 2  | ✓   |
| LHL GLCM maximal correlation coefficient        | ✓   |
| LHL GLCM joint maximum                          | ✓   |
| LHL GLCM joint average                          | ✓   |
| LHL GLCM difference average                     | ✓   |
| LHL GLCM dissimilarity                          | ✓   |
| LHL GLCM inverse variance                       |     |
| LHL GLCM autocorrelation                        | ✓   |
| LHL GLCM cluster tendency                       | ✓   |
| LHL GLCM cluster shade                          | ✓   |
| LHL GLCM cluster prominence                     | ✓   |
| LHL mGLCM energy                                |     |
| LHL mGLCM entropy                               | ✓   |
| LHL mGLCM contrast                              | ✓   |
| LHL mGLCM correlation                           |     |
| LHL mGLCM homogeneity                           | ✓   |
| LHL mGLCM homogeneity normalized                |     |
| LHL mGLCM inverse difference                    | ✓   |
| LHL mGLCM inverse difference normalized         |     |
| LHL mGLCM variance                              | ✓   |
| LHL mGLCM sum of average                        | ✓   |
| LHL mGLCM sum of entropy                        | ✓   |
| LHL mGLCM sum of variance                       | ✓   |
| LHL mGLCM difference entropy                    | ✓   |
| LHL mGLCM difference variance                   | ✓   |
| LHL mGLCM information measures of correlation 1 |     |
| LHL mGLCM information measures of correlation 2 | ✓   |

| Feature name                                   | MPM |
|------------------------------------------------|-----|
| LHL mGLCM maximal correlation coefficient      | ✓   |
| LHL mGLCM joint maximum                        | ✓   |
| LHL mGLCM joint average                        | ✓   |
| LHL mGLCM difference average                   | ✓   |
| LHL mGLCM dissimilarity                        | ✓   |
| LHL mGLCM inverse variance                     |     |
| LHL mGLCM autocorrelation                      | ✓   |
| LHL mGLCM cluster tendency                     | ✓   |
| LHL mGLCM cluster shade                        | ✓   |
| LHL mGLCM cluster prominence                   | ✓   |
| LHL NGTDM coarseness                           | ✓   |
| LHL NGTDM contrast                             |     |
| LHL NGTDM busyness                             |     |
| LHL NGTDM complexity                           | ✓   |
| LHL NGTDM strength                             |     |
| LHL GRLM grey level non-uniformity             |     |
| LHL GRLM grey level non-uniformity normalized  | ✓   |
| LHL GRLM zone size non-uniformity              | ✓   |
| LHL GRLM zone size non-uniformity normalized   |     |
| LHL GRLM short runs emphasis                   |     |
| LHL GRLM long runs emphasis                    |     |
| LHL GRLM low grey level run emphasis           | ✓   |
| LHL GRLM high grey level run emphasis          | ✓   |
| LHL GRLM short run low grey level emphasis     | ✓   |
| LHL GRLM short run high grey level emphasis    | ✓   |
| LHL GRLM long run low grey level emphasis      |     |
| LHL GRLM long run high grey level emphasis     | ✓   |
| LHL GRLM run percentage                        |     |
| LHL GRLM grey level variance                   | ✓   |
| LHL GRLM run length variance                   |     |
| LHL GRLM run entropy                           |     |
| LHL mGRLM grey level non-uniformity            |     |
| LHL mGRLM grey level non-uniformity normalized | ✓   |
| LHL mGRLM zone size non-uniformity             | ✓   |
| LHL mGRLM zone size non-uniformity normalized  |     |
| LHL mGRLM short runs emphasis                  |     |
| LHL mGRLM long runs emphasis                   |     |
| LHL mGRLM low grey level run emphasis          | ✓   |
| LHL mGRLM high grey level run emphasis         | ✓   |
| LHL mGRLM short run low grey level emphasis    | ✓   |
| LHL mGRLM short run high grey level emphasis   | ✓   |

| Feature name                                         | MPM |
|------------------------------------------------------|-----|
| LHL mGRLM long run low grey level emphasis           |     |
| LHL mGRLM long run high grey level emphasis          | ✓   |
| LHL mGRLM run percentage                             |     |
| LHL mGRLM grey level variance                        | ✓   |
| LHL mGRLM run length variance                        |     |
| LHL mGRLM run entropy                                |     |
| LHL GLSZM grey level non-uniformity                  |     |
| LHL GLSZM grey level non-uniformity normalized       | ✓   |
| LHL GLSZM zone size non-uniformity                   | ✓   |
| LHL GLSZM zone size non-uniformity normalized        |     |
| LHL GLSZM small zone emphasis                        | ✓   |
| LHL GLSZM large zone emphasis                        |     |
| LHL GLSZM low grey level zone emphasis               | ✓   |
| LHL GLSZM high grey level zone emphasis              | ✓   |
| LHL GLSZM small zone low grey level emphasis         |     |
| LHL GLSZM small zone high grey level emphasis        | ✓   |
| LHL GLSZM large zone low grey level emphasis         |     |
| LHL GLSZM large zone high grey level emphasis        |     |
| LHL GLSZM zone percentage                            |     |
| LHL GLSZM grey level variance                        | ✓   |
| LHL GLSZM zone size variance                         |     |
| LHL GLSZM zone size entropy                          | ✓   |
| LHL GLDZM grey level non-uniformity                  |     |
| LHL GLDZM grey level non-uniformity normalized       | ✓   |
| LHL GLDZM zone size non-uniformity                   | ✓   |
| LHL GLDZM zone size non-uniformity normalized        |     |
| LHL GLDZM small distance emphasis                    |     |
| LHL GLDZM large distance emphasis                    |     |
| LHL GLDZM low grey level zone emphasis               | ✓   |
| LHL GLDZM high grey level zone emphasis              | ✓   |
| LHL GLDZM small distance low grey level emphasis     | ✓   |
| LHL GLDZM small distance high grey level emphasis    | ✓   |
| LHL GLDZM large distance low grey level emphasis     | ✓   |
| LHL GLDZM large distance high grey level emphasis    | ✓   |
| LHL GLDZM zone percentage                            |     |
| LHL GLDZM grey level variance                        | ✓   |
| LHL GLDZM zone distance variance                     |     |
| LHL GLDZM zone distance entropy                      | ✓   |
| LHL NGLDM grey level non-uniformity                  |     |
| LHL NGLDM grey level non-uniformity normalized       | ✓   |
| LHL NGLDM dependence count non-uniformity            |     |
| LHL NGLDM dependence count non-uniformity normalized |     |

| Feature name                                       | MPM |
|----------------------------------------------------|-----|
| LHL NGLDM low dependence emphasis                  | ✓   |
| LHL NGLDM high dependence emphasis                 |     |
| LHL NGLDM low grey level count emphasis            | ✓   |
| LHL NGLDM high grey level count emphasis           | ✓   |
| LHL NGLDM low dependence low grey level emphasis   |     |
| LHL NGLDM low dependence high grey level emphasis  | ✓   |
| LHL NGLDM high dependence low grey level emphasis  |     |
| LHL NGLDM high dependence high grey level emphasis |     |
| LHL NGLDM grey level variance                      | ✓   |
| LHL NGLDM dependence count variance                |     |
| LHL NGLDM dependence count entropy                 | ✓   |
| LHL NGLDM dependence count energy                  |     |
| LLH intensity mean                                 |     |
| LLH intensity standard deviation                   | ✓   |
| LLH intensity coefficient of variation             |     |
| LLH intensity skewness                             |     |
| LLH intensity kurtosis                             |     |
| LLH intensity variance                             | ✓   |
| LLH intensity median                               |     |
| LLH intensity percentile 10th                      | ✓   |
| LLH intensity percentile 90th                      | ✓   |
| LLH intensity interquartile range                  | ✓   |
| LLH intensity range                                | ✓   |
| LLH intensity mean absolut deviation               | ✓   |
| LLH intensity robust mean absolut deviation        | ✓   |
| LLH intensity energy                               | ✓   |
| LLH intensity entropy                              | ✓   |
| LLH intensity root mean square                     | ✓   |
| LLH intensity uniformity                           | ✓   |
| LLH GLCM energy                                    | ✓   |
| LLH GLCM entropy                                   | ✓   |
| LLH GLCM contrast                                  | ✓   |
| LLH GLCM correlation                               |     |
| LLH GLCM homogeneity                               | ✓   |
| LLH GLCM homogeneity normalized                    |     |
| LLH GLCM inverse difference                        | ✓   |
| LLH GLCM inverse difference normalized             |     |
| LLH GLCM variance                                  | ✓   |
| LLH GLCM sum of average                            | ✓   |
| LLH GLCM sum of entropy                            | ✓   |
| LLH GLCM sum of variance                           | ✓   |

| Feature name                                    | MPM |
|-------------------------------------------------|-----|
| LLH GLCM difference entropy                     | ✓   |
| LLH GLCM difference variance                    | ✓   |
| LLH GLCM information measures of correlation 1  |     |
| LLH GLCM information measures of correlation 2  | ✓   |
| LLH GLCM maximal correlation coefficient        |     |
| LLH GLCM joint maximum                          | ✓   |
| LLH GLCM joint average                          | ✓   |
| LLH GLCM difference average                     | ✓   |
| LLH GLCM dissimilarity                          | ✓   |
| LLH GLCM inverse variance                       |     |
| LLH GLCM autocorrelation                        |     |
| LLH GLCM cluster tendency                       | ✓   |
| LLH GLCM cluster shade                          |     |
| LLH GLCM cluster prominence                     | ✓   |
| LLH mGLCM energy                                | ✓   |
| LLH mGLCM entropy                               | ✓   |
| LLH mGLCM contrast                              | ✓   |
| LLH mGLCM correlation                           |     |
| LLH mGLCM homogeneity                           | ✓   |
| LLH mGLCM homogeneity normalized                |     |
| LLH mGLCM inverse difference                    | ✓   |
| LLH mGLCM inverse difference normalized         |     |
| LLH mGLCM variance                              | ✓   |
| LLH mGLCM sum of average                        | ✓   |
| LLH mGLCM sum of entropy                        | ✓   |
| LLH mGLCM sum of variance                       | ✓   |
| LLH mGLCM difference entropy                    | ✓   |
| LLH mGLCM difference variance                   | ✓   |
| LLH mGLCM information measures of correlation 1 |     |
| LLH mGLCM information measures of correlation 2 | ✓   |
| LLH mGLCM maximal correlation coefficient       |     |
| LLH mGLCM joint maximum                         | ✓   |
| LLH mGLCM joint average                         | ✓   |
| LLH mGLCM difference average                    | ✓   |
| LLH mGLCM dissimilarity                         | ✓   |
| LLH mGLCM inverse variance                      |     |
| LLH mGLCM autocorrelation                       |     |
| LLH mGLCM cluster tendency                      | ✓   |
| LLH mGLCM cluster shade                         |     |
| LLH mGLCM cluster prominence                    | ✓   |
| LLH NGTDM coarseness                            |     |

| Feature name                                   | MPM |
|------------------------------------------------|-----|
| LLH NGTDM contrast                             |     |
| LLH NGTDM busyness                             |     |
| LLH NGTDM complexity                           | ✓   |
| LLH NGTDM strength                             | ✓   |
| LLH GRLM grey level non-uniformity             |     |
| LLH GRLM grey level non-uniformity normalized  | ✓   |
| LLH GRLM zone size non-uniformity              | ✓   |
| LLH GRLM zone size non-uniformity normalized   |     |
| LLH GRLM short runs emphasis                   |     |
| LLH GRLM long runs emphasis                    |     |
| LLH GRLM low grey level run emphasis           | ✓   |
| LLH GRLM high grey level run emphasis          |     |
| LLH GRLM short run low grey level emphasis     | ✓   |
| LLH GRLM short run high grey level emphasis    | ✓   |
| LLH GRLM long run low grey level emphasis      |     |
| LLH GRLM long run high grey level emphasis     |     |
| LLH GRLM run percentage                        |     |
| LLH GRLM grey level variance                   | ✓   |
| LLH GRLM run length variance                   |     |
| LLH GRLM run entropy                           |     |
| LLH mGRLM grey level non-uniformity            |     |
| LLH mGRLM grey level non-uniformity normalized | ✓   |
| LLH mGRLM zone size non-uniformity             | ✓   |
| LLH mGRLM zone size non-uniformity normalized  |     |
| LLH mGRLM short runs emphasis                  |     |
| LLH mGRLM long runs emphasis                   |     |
| LLH mGRLM low grey level run emphasis          | ✓   |
| LLH mGRLM high grey level run emphasis         |     |
| LLH mGRLM short run low grey level emphasis    | ✓   |
| LLH mGRLM short run high grey level emphasis   | ✓   |
| LLH mGRLM long run low grey level emphasis     |     |
| LLH mGRLM long run high grey level emphasis    |     |
| LLH mGRLM run percentage                       |     |
| LLH mGRLM grey level variance                  | ✓   |
| LLH mGRLM run length variance                  |     |
| LLH mGRLM run entropy                          |     |
| LLH GLSZM grey level non-uniformity            |     |
| LLH GLSZM grey level non-uniformity normalized | ✓   |
| LLH GLSZM zone size non-uniformity             | ✓   |
| LLH GLSZM zone size non-uniformity normalized  |     |
| LLH GLSZM small zone emphasis                  |     |
| LLH GLSZM large zone emphasis                  |     |

| Feature name                                         | MPM |
|------------------------------------------------------|-----|
| LLH GLSZM low grey level zone emphasis               |     |
| LLH GLSZM high grey level zone emphasis              |     |
| LLH GLSZM small zone low grey level emphasis         |     |
| LLH GLSZM small zone high grey level emphasis        |     |
| LLH GLSZM large zone low grey level emphasis         |     |
| LLH GLSZM large zone high grey level emphasis        |     |
| LLH GLSZM zone percentage                            |     |
| LLH GLSZM grey level variance                        | ✓   |
| LLH GLSZM zone size variance                         |     |
| LLH GLSZM zone size entropy                          | ✓   |
| LLH GLDZM grey level non-uniformity                  |     |
| LLH GLDZM grey level non-uniformity normalized       | ✓   |
| LLH GLDZM zone size non-uniformity                   | ✓   |
| LLH GLDZM zone size non-uniformity normalized        |     |
| LLH GLDZM small distance emphasis                    |     |
| LLH GLDZM large distance emphasis                    |     |
| LLH GLDZM low grey level zone emphasis               |     |
| LLH GLDZM high grey level zone emphasis              |     |
| LLH GLDZM small distance low grey level emphasis     |     |
| LLH GLDZM small distance high grey level emphasis    | ✓   |
| LLH GLDZM large distance low grey level emphasis     |     |
| LLH GLDZM large distance high grey level emphasis    |     |
| LLH GLDZM zone percentage                            |     |
| LLH GLDZM grey level variance                        | ✓   |
| LLH GLDZM zone distance variance                     |     |
| LLH GLDZM zone distance entropy                      | ✓   |
| LLH NGLDM grey level non-uniformity                  |     |
| LLH NGLDM grey level non-uniformity normalized       | ✓   |
| LLH NGLDM dependence count non-uniformity            |     |
| LLH NGLDM dependence count non-uniformity normalized |     |
| LLH NGLDM low dependence emphasis                    | ✓   |
| LLH NGLDM high dependence emphasis                   |     |
| LLH NGLDM low grey level count emphasis              | ✓   |
| LLH NGLDM high grey level count emphasis             |     |
| LLH NGLDM low dependence low grey level emphasis     |     |
| LLH NGLDM low dependence high grey level emphasis    | ✓   |
| LLH NGLDM high dependence low grey level emphasis    |     |
| LLH NGLDM high dependence high grey level emphasis   |     |
| LLH NGLDM grey level variance                        | ✓   |
| LLH NGLDM dependence count variance                  |     |
| LLH NGLDM dependence count entropy                   |     |
| LLH NGLDM dependence count energy                    |     |
| LLL intensity mean                                   | ✓   |

| Feature name                                   | MPM |
|------------------------------------------------|-----|
| LLL intensity standard deviation               | ✓   |
| LLL intensity coefficient of variation         | ✓   |
| LLL intensity skewness                         |     |
| LLL intensity kurtosis                         |     |
| LLL intensity variance                         | ✓   |
| LLL intensity median                           | ✓   |
| LLL intensity percentile 10th                  |     |
| LLL intensity percentile 90th                  | ✓   |
| LLL intensity interquartile range              | ✓   |
| LLL intensity range                            | ✓   |
| LLL intensity mean absolut deviation           | ✓   |
| LLL intensity robust mean absolut deviation    | ✓   |
| LLL intensity energy                           | ✓   |
| LLL intensity entropy                          | ✓   |
| LLL intensity root mean square                 | ✓   |
| LLL intensity uniformity                       | ✓   |
| LLL GLCM energy                                |     |
| LLL GLCM entropy                               | ✓   |
| LLL GLCM contrast                              | ✓   |
| LLL GLCM correlation                           |     |
| LLL GLCM homogeneity                           | ✓   |
| LLL GLCM homogeneity normalized                |     |
| LLL GLCM inverse difference                    | ✓   |
| LLL GLCM inverse difference normalized         |     |
| LLL GLCM variance                              | ✓   |
| LLL GLCM sum of average                        | ✓   |
| LLL GLCM sum of entropy                        | ✓   |
| LLL GLCM sum of variance                       | ✓   |
| LLL GLCM difference entropy                    | ✓   |
| LLL GLCM difference variance                   | ✓   |
| LLL GLCM information measures of correlation 1 |     |
| LLL GLCM information measures of correlation 2 | ✓   |
| LLL GLCM maximal correlation coefficient       |     |
| LLL GLCM joint maximum                         |     |
| LLL GLCM joint average                         | ✓   |
| LLL GLCM difference average                    | ✓   |
| LLL GLCM dissimilarity                         | ✓   |
| LLL GLCM inverse variance                      | ✓   |
| LLL GLCM autocorrelation                       | ✓   |
| LLL GLCM cluster tendency                      | ✓   |

| Feature name                                    | MPM |
|-------------------------------------------------|-----|
| LLL GLCM cluster shade                          | ✓   |
| LLL GLCM cluster prominence                     | ✓   |
| LLL mGLCM energy                                | ✓   |
| LLL mGLCM entropy                               | ✓   |
| LLL mGLCM contrast                              | ✓   |
| LLL mGLCM correlation                           |     |
| LLL mGLCM homogeneity                           | ✓   |
| LLL mGLCM homogeneity normalized                |     |
| LLL mGLCM inverse difference                    | ✓   |
| LLL mGLCM inverse difference normalized         |     |
| LLL mGLCM variance                              | ✓   |
| LLL mGLCM sum of average                        | ✓   |
| LLL mGLCM sum of entropy                        | ✓   |
| LLL mGLCM sum of variance                       | ✓   |
| LLL mGLCM difference entropy                    | ✓   |
| LLL mGLCM difference variance                   | ✓   |
| LLL mGLCM information measures of correlation 1 |     |
| LLL mGLCM information measures of correlation 2 |     |
| LLL mGLCM maximal correlation coefficient       |     |
| LLL mGLCM joint maximum                         |     |
| LLL mGLCM joint average                         | ✓   |
| LLL mGLCM difference average                    | ✓   |
| LLL mGLCM dissimilarity                         | ✓   |
| LLL mGLCM inverse variance                      | ✓   |
| LLL mGLCM autocorrelation                       | ✓   |
| LLL mGLCM cluster tendency                      | ✓   |
| LLL mGLCM cluster shade                         | ✓   |
| LLL mGLCM cluster prominence                    | ✓   |
| LLL NGTDM coarseness                            |     |
| LLL NGTDM contrast                              |     |
| LLL NGTDM busyness                              |     |
| LLL NGTDM complexity                            | ✓   |
| LLL NGTDM strength                              | ✓   |
| LLL GRLM grey level non-uniformity              |     |
| LLL GRLM grey level non-uniformity normalized   | ✓   |
| LLL GRLM zone size non-uniformity               | ✓   |
| LLL GRLM zone size non-uniformity normalized    | ✓   |
| LLL GRLM short runs emphasis                    | ✓   |
| LLL GRLM long runs emphasis                     |     |
| LLL GRLM low grey level run emphasis            | ✓   |
| LLL GRLM high grey level run emphasis           | ✓   |

| Feature name                                   | MPM |
|------------------------------------------------|-----|
| LLL GRLM short run low grey level emphasis     |     |
| LLL GRLM short run high grey level emphasis    | ✓   |
| LLL GRLM long run low grey level emphasis      |     |
| LLL GRLM long run high grey level emphasis     | ✓   |
| LLL GRLM run percentage                        |     |
| LLL GRLM grey level variance                   | ✓   |
| LLL GRLM run length variance                   |     |
| LLL GRLM run entropy                           | ✓   |
| LLL mGRLM grey level non-uniformity            |     |
| LLL mGRLM grey level non-uniformity normalized | ✓   |
| LLL mGRLM zone size non-uniformity             | ✓   |
| LLL mGRLM zone size non-uniformity normalized  | ✓   |
| LLL mGRLM short runs emphasis                  |     |
| LLL mGRLM long runs emphasis                   |     |
| LLL mGRLM low grey level run emphasis          | ✓   |
| LLL mGRLM high grey level run emphasis         | ✓   |
| LLL mGRLM short run low grey level emphasis    |     |
| LLL mGRLM short run high grey level emphasis   | ✓   |
| LLL mGRLM long run low grey level emphasis     |     |
| LLL mGRLM long run high grey level emphasis    | ✓   |
| LLL mGRLM run percentage                       |     |
| LLL mGRLM grey level variance                  | ✓   |
| LLL mGRLM run length variance                  |     |
| LLL mGRLM run entropy                          | ✓   |
| LLL GLSZM grey level non-uniformity            | ✓   |
| LLL GLSZM grey level non-uniformity normalized | ✓   |
| LLL GLSZM zone size non-uniformity             | ✓   |
| LLL GLSZM zone size non-uniformity normalized  |     |
| LLL GLSZM small zone emphasis                  |     |
| LLL GLSZM large zone emphasis                  |     |
| LLL GLSZM low grey level zone emphasis         |     |
| LLL GLSZM high grey level zone emphasis        | ✓   |
| LLL GLSZM small zone low grey level emphasis   |     |
| LLL GLSZM small zone high grey level emphasis  | ✓   |
| LLL GLSZM large zone low grey level emphasis   |     |
| LLL GLSZM large zone high grey level emphasis  |     |
| LLL GLSZM zone percentage                      | ✓   |
| LLL GLSZM grey level variance                  | ✓   |
| LLL GLSZM zone size variance                   |     |
| LLL GLSZM zone size entropy                    | ✓   |
| LLL GLDZM grey level non-uniformity            | ✓   |

| Feature name                                         | MPM |
|------------------------------------------------------|-----|
| LLL GLDZM grey level non-uniformity normalized       | ✓   |
| LLL GLDZM zone size non-uniformity                   | ✓   |
| LLL GLDZM zone size non-uniformity normalized        |     |
| LLL GLDZM small distance emphasis                    |     |
| LLL GLDZM large distance emphasis                    |     |
| LLL GLDZM low grey level zone emphasis               |     |
| LLL GLDZM high grey level zone emphasis              | ✓   |
| LLL GLDZM small distance low grey level emphasis     |     |
| LLL GLDZM small distance high grey level emphasis    | ✓   |
| LLL GLDZM large distance low grey level emphasis     |     |
| LLL GLDZM large distance high grey level emphasis    | ✓   |
| LLL GLDZM zone percentage                            | ✓   |
| LLL GLDZM grey level variance                        | ✓   |
| LLL GLDZM zone distance variance                     |     |
| LLL GLDZM zone distance entropy                      | ✓   |
| LLL NGLDM grey level non-uniformity                  |     |
| LLL NGLDM grey level non-uniformity normalized       | ✓   |
| LLL NGLDM dependence count non-uniformity            | ✓   |
| LLL NGLDM dependence count non-uniformity normalized |     |
| LLL NGLDM low dependence emphasis                    | ✓   |
| LLL NGLDM high dependence emphasis                   |     |
| LLL NGLDM low grey level count emphasis              | ✓   |
| LLL NGLDM high grey level count emphasis             | ✓   |
| LLL NGLDM low dependence low grey level emphasis     |     |
| LLL NGLDM low dependence high grey level emphasis    | ✓   |
| LLL NGLDM high dependence low grey level emphasis    |     |
| LLL NGLDM high dependence high grey level emphasis   |     |
| LLL NGLDM grey level variance                        | ✓   |
| LLL NGLDM dependence count variance                  |     |
| LLL NGLDM dependence count entropy                   |     |
| LLL NGLDM dependence count energy                    |     |

Table 4: Stable wavelet features, intraclass correlation coefficient  $>0.8$ . MPM – malignant pleural mesothelioma, GLCM – the Gray Level Co-occurrence Matrix, mGLCM – the Gray Level Co-occurrence Matrix, NGTDM – the Neighborhood Gray Tone Difference Matrix, GLRM – the Gray Level Run Length Matrix, mGRLM – the merged Gray Level Run Length Matrix, GLSZM – the Gray Level Size Zone Matrix, GLDZM – the Gray Level Distance Zone Matrix, NGLDM – the Neighboring Gray Level Dependence Matrix, H – high-pass filter, L – low-pass filter
